# Supplementary material for: Poly(methacrylic acid)-based AB and ABC block copolymer nano-objects prepared via RAFT alcoholic dispersion polymerization
Source: Royal Society of Chemistry journal article supplement (doi:10.1039/c4py00201f), 2014-01-01
Supplement: c4py00201f1.pdf [file c4py00201f1.pdf]

**Supporting Information for PY ART 02 2014 000201**

**Poly(methacrylic acid)-based AB and ABC Copolymer Nano-Objects  
prepared via RAFT Alcoholic Dispersion Polymerization**

M. Semsarilar, V. Ladmira, A. Blana and S. P. Armes\*

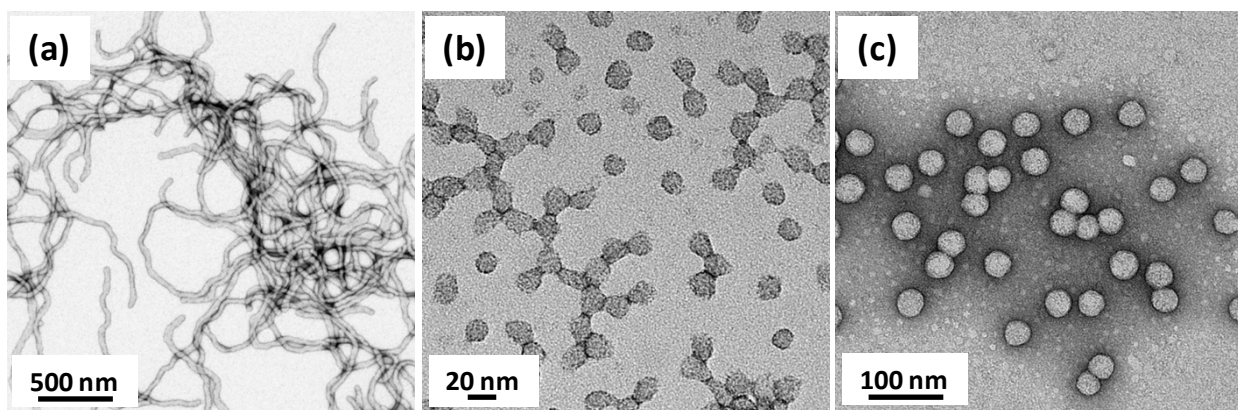

**Figure S1.** Representative TEM images obtained during the early stages of growth of the PTFEMA block in the synthesis of a PMAA<sub>70</sub>-PBzMA<sub>100</sub>-PTFEMA<sub>300</sub> triblock copolymer via RAFT dispersion polymerization in ethanol at 70°C: (a) initial PMAA<sub>70</sub>-PBzMA<sub>100</sub> macro-CTA; (b) after 5 minutes, PMAA<sub>70</sub>-PBzMA<sub>100</sub> + TFEMA monomer; (c) after 1 h, PMAA<sub>70</sub>-PBzMA<sub>100</sub>-PTFEMA<sub>33</sub>.
